# Supplementary material
Source: MDPI journal article supplement (https://www.mdpi.com/2073-4352/13/4/617)
Supplement: s1 [file s1]

# Supplementary Information

## Relative Stability of Pyrazinamide Polymorphs Revisited, a Computational Study of Bending and Brittle Forms Phase Transitions in a Broad Temperature Range

Aleksandr S. Dubok, Denis A. Rychkov

Relative Gibbs free energies should be calculated with care, taking into account the need to use a supercell. Otherwise, it may lead to inconsistent data as presented below. Both methods incorrectly show lower stability of  $\alpha$ ,  $\gamma$  and  $\delta$  form in relation to  $\beta$  with temperature increase.

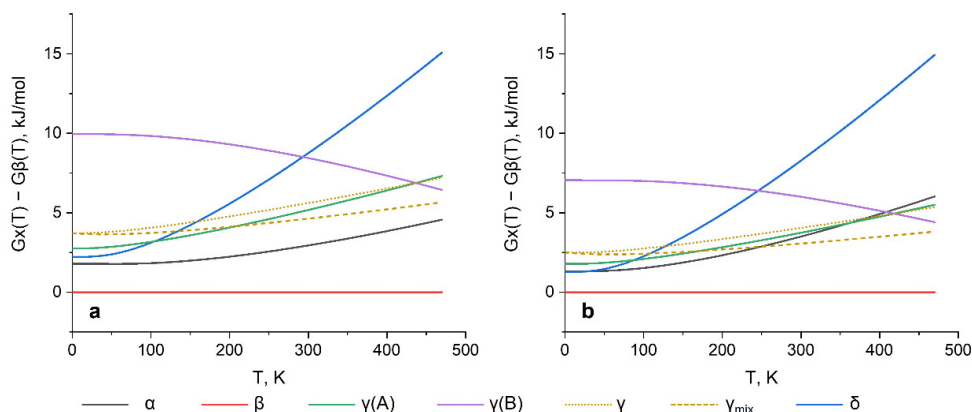

**Figure S1:** Calculated relative Gibbs free energies using full unit cell (no supercell) (a) finite difference approach using PBE-D3BJ functional, (b) DFPT approach using nonlocal rev-vdW-DF2 functional.

As it can be seen from Table S1, the optimized structures are almost identical to the initial geometries (volume deviation <2%, RMSD of atomic positions <0.1 Å), except for the disorder state  $\gamma$ (B), which is quite close.

**Table S1:** Comparison between initial parameters of experimental crystallographic data and optimized crystal structures for the of  $\alpha$ (PYRZIN22),  $\beta$ (PYRZIN18),  $\gamma$ (PYRZIN19) and  $\delta$  form (PYRZIN16) calculated using DFT-PBE-D3BJ level of theory . Difference in % is given in brackets.

|                        | $\alpha$ |                     | $\beta$ |                     | $\gamma$ |                     |                     | $\delta$ |                     |
|------------------------|----------|---------------------|---------|---------------------|----------|---------------------|---------------------|----------|---------------------|
|                        | Exp.     | Opt.                | Exp.    | Opt.                | Exp.     | Opt.(A)             | Opt.(B)             | Exp.     | Opt.                |
| a, Å                   | 3.617    | 3.621<br>(0.09%)    | 14.315  | 14.208<br>(-0.75%)  | 7.176    | 7.120<br>(-0.78%)   | 6.953<br>(-3.11%)   | 5.119    | 5.132<br>(+0.26%)   |
| b, Å                   | 6.741    | 6.693<br>(-0.71%)   | 3.624   | 3.644<br>(+0.56%)   | 3.651    | 3.690<br>(+1.09%)   | 3.756<br>(+2.89%)   | 5.705    | 5.659<br>(-0.81%)   |
| c, Å                   | 22.463   | 22.280<br>(-0.81%)  | 10.616  | 10.481<br>(-1.27%)  | 10.663   | 10.449<br>(-2.00%)  | 10.153<br>(-4.79%)  | 9.857    | 9.791<br>(-0.67%)   |
| $\alpha$ , °           | 90.000   | 90.000<br>(0.00%)   | 90.000  | 90.000<br>(0.00%)   | 90.000   | 90.000<br>(0.00%)   | 90.000<br>(0.00%)   | 97.463   | 97.692<br>(+0.24%)  |
| $\beta$ , °            | 92.395   | 92.622<br>(0.25%)   | 101.119 | 100.794<br>(-0.32%) | 106.337  | 105.860<br>(-0.45%) | 104.805<br>(-1.44%) | 98.173   | 97.888<br>(-0.29%)  |
| $\gamma$ , °           | 90.000   | 90.000<br>(0.00%)   | 90.000  | 90.000<br>(0.00%)   | 90.000   | 90.000<br>(0.00%)   | 90.000<br>(0.00%)   | 106.473  | 107.035<br>(+0.53%) |
| Volume, Å <sup>3</sup> | 547.276  | 539.342<br>(-1.45%) | 540.354 | 533.054<br>(-1.35%) | 268.057  | 264.100<br>(-1.48%) | 256.341<br>(-4.37%) | 268.818  | 264.716<br>(-1.53%) |
| RMSD, Å                |          | 0.049               |         | 0.058               |          | 0.088               | 0.533               |          | 0.053               |
